# Supplementary material for: Prediction of two-dimensional ferroelectric metal Mxenes
Source: Royal Society of Chemistry journal article supplement (doi:10.1039/d1tc02213j), 2021-01-01
Supplement: d1tc02213j1.pdf [file d1tc02213j1.pdf]

## Supplementary Information

### Prediction of Two-Dimensional Metal Ferroelectric Mxenes

Dimuthu Wijethunge<sup>1,2</sup>, Lei Zhang<sup>1,2</sup> and Aijun Du<sup>1,2\*</sup>

<sup>1</sup>School of Chemistry and Physics, Queensland University of Technology, Gardens Point Campus, Brisbane, QLD  
4000, Australia

<sup>2</sup>Centre for Materials Science, Queensland University of Technology, Gardens Point Campus, Brisbane, QLD  
4000, Australia

[\\*aijun.du@qut.edu.au](mailto:aijun.du@qut.edu.au)

#### Total Energy Comparison:

**Table S1:** The total energy comparison of 72 Mxene compositions ( $M_2XS_2$ : M = Sc, Y, Ti, Zr, Hf, V, Nb, Ta, Cr, Mo, W, Mn; X=C, N; S=O, OH, F) considering six different crystal structures. Units are in eV and lowest energy for each material is highlighted.

|           |                                     |                                        |                                     |                                 |                                    |                                 |
|-----------|-------------------------------------|----------------------------------------|-------------------------------------|---------------------------------|------------------------------------|---------------------------------|
|           | <b>Sc<sub>2</sub>NO<sub>2</sub></b> | <b>Sc<sub>2</sub>N(OH)<sub>2</sub></b> | <b>Sc<sub>2</sub>NF<sub>2</sub></b> | Sc <sub>2</sub> CO <sub>2</sub> | Sc <sub>2</sub> C(OH) <sub>2</sub> | Sc <sub>2</sub> CF <sub>2</sub> |
| <b>T1</b> | <b>-43.0951</b>                     | <b>-51.2137</b>                        | <b>-39.5393</b>                     | -40.9785                        | <b>-49.5873</b>                    | <b>-38.1063</b>                 |
| <b>T2</b> | -42.3261                            | -50.6858                               | -38.7921                            | -41.4542                        | -48.8287                           | -36.9072                        |
| <b>T3</b> | -42.7873                            | -50.9465                               | -39.2009                            | <b>-41.5231</b>                 | -49.2217                           | -37.5281                        |
| <b>H1</b> | -42.0521                            | -49.7851                               | -37.8741                            | -40.9023                        | -48.0079                           | -37.2890                        |
| <b>H2</b> | -42.8936                            | -50.2739                               | -38.6330                            | -40.9802                        | -48.6882                           | -37.2890                        |
| <b>H3</b> | -42.4343                            | -50.0277                               | -38.3246                            | -40.9539                        | -48.2194                           | -36.6561                        |
|           |                                     |                                        |                                     |                                 |                                    |                                 |
|           | <b>Y<sub>2</sub>NO<sub>2</sub></b>  | <b>Y<sub>2</sub>N(OH)<sub>2</sub></b>  | <b>Y<sub>2</sub>NF<sub>2</sub></b>  | Y <sub>2</sub> CO <sub>2</sub>  | Y <sub>2</sub> C(OH) <sub>2</sub>  | Y <sub>2</sub> CF <sub>2</sub>  |
| <b>T1</b> | <b>-43.3285</b>                     | <b>-51.0748</b>                        | <b>-39.4479</b>                     | -41.253                         | <b>-49.5798</b>                    | <b>-38.2083</b>                 |
| <b>T2</b> | -42.6755                            | -50.6796                               | -38.8867                            | -41.5365                        | -48.9700                           | -37.1773                        |
| <b>T3</b> | -43.1039                            | -49.2822                               | -39.2125                            | <b>-41.6780</b>                 | -49.2822                           | -37.7095                        |
| <b>H1</b> | -42.3698                            | -49.6715                               | -37.8423                            | -40.9391                        | -48.0867                           | -36.3443                        |
| <b>H2</b> | -43.0714                            | -49.9795                               | -38.2860                            | -41.1072                        | -48.5934                           | -37.2665                        |
| <b>H3</b> | -42.6913                            | -49.8725                               | -38.1992                            | -40.9343                        | -48.3395                           | -36.8130                        |
|           |                                     |                                        |                                     |                                 |                                    |                                 |
|           | <b>Ti<sub>2</sub>NO<sub>2</sub></b> | <b>Ti<sub>2</sub>N(OH)<sub>2</sub></b> | <b>Ti<sub>2</sub>NF<sub>2</sub></b> | Ti <sub>2</sub> CO <sub>2</sub> | Ti <sub>2</sub> C(OH) <sub>2</sub> | Ti <sub>2</sub> CF <sub>2</sub> |
| <b>T1</b> | <b>-46.1314</b>                     | <b>-52.5683</b>                        | <b>-40.455</b>                      | <b>-45.1548</b>                 | <b>-51.8955</b>                    | <b>-39.8582</b>                 |
| <b>T2</b> | -44.9983                            | -52.3307                               | -40.1283                            | -43.4224                        | -51.5794                           | -39.3441                        |
| <b>T3</b> | -45.6145                            | -52.3037                               | -40.0638                            | -44.3901                        | -51.7727                           | -39.6547                        |
| <b>H1</b> | -44.7456                            | -51.9311                               | -39.8397                            | -43.1824                        | -50.5473                           | -38.3494                        |
| <b>H2</b> | -45.8115                            | -51.7139                               | -39.4368                            | -44.8272                        | -50.8379                           | -38.8717                        |
| <b>H3</b> | -45.3421                            | -51.8048                               | -39.6800                            | -44.0464                        | -50.6971                           | -38.6023                        |
|           |                                     |                                        |                                     |                                 |                                    |                                 |
|           | <b>Zr<sub>2</sub>NO<sub>2</sub></b> | <b>Zr<sub>2</sub>N(OH)<sub>2</sub></b> | <b>Zr<sub>2</sub>NF<sub>2</sub></b> | Zr <sub>2</sub> CO <sub>2</sub> | Zr <sub>2</sub> C(OH) <sub>2</sub> | Zr <sub>2</sub> CF <sub>2</sub> |
| <b>T1</b> | <b>-48.7624</b>                     | <b>-54.1632</b>                        | <b>-42.0631</b>                     | <b>-48.0138</b>                 | <b>-53.8084</b>                    | <b>-41.8419</b>                 |
| <b>T2</b> | -47.6135                            | -54.1134                               | -41.9213                            | -46.0116                        | -53.6688                           | -41.5227                        |

|           |                                     |                                        |                                     |                                     |                                        |                                     |
|-----------|-------------------------------------|----------------------------------------|-------------------------------------|-------------------------------------|----------------------------------------|-------------------------------------|
| <b>T3</b> | -48.3146                            | -54.0021                               | -41.7381                            | -47.1171                            | -53.8044                               | -41.7796                            |
| <b>H1</b> | -47.0340                            | -53.4752                               | -41.3900                            | -45.515                             | -52.2695                               | -40.1473                            |
| <b>H2</b> | -48.1319                            | -53.1326                               | -41.0148                            | -47.3668                            | -52.3484                               | -40.3630                            |
| <b>H3</b> | -47.7083                            | -53.2552                               | -41.1332                            | -46.4909                            | -52.3404                               | -40.2586                            |
|           |                                     |                                        |                                     |                                     |                                        |                                     |
|           | <b>Hf<sub>2</sub>NO<sub>2</sub></b> | <b>Hf<sub>2</sub>N(OH)<sub>2</sub></b> | <b>Hf<sub>2</sub>NF<sub>2</sub></b> | <b>Hf<sub>2</sub>CO<sub>2</sub></b> | <b>Hf<sub>2</sub>C(OH)<sub>2</sub></b> | <b>Hf<sub>2</sub>CF<sub>2</sub></b> |
| <b>T1</b> | <b>-51.9979</b>                     | -56.7472                               | -44.3762                            | <b>-51.421</b>                      | -56.6776                               | <b>-44.5456</b>                     |
| <b>T2</b> | -50.8393                            | <b>-56.8223</b>                        | <b>-44.5246</b>                     | -49.2563                            | -56.5368                               | -44.2475                            |
| <b>T3</b> | -51.5386                            | -56.6484                               | -44.1907                            | -50.4362                            | <b>-56.6804</b>                        | -44.5156                            |
| <b>H1</b> | -50.1439                            | -56.1489                               | -44.0174                            | -48.7041                            | -54.9773                               | -42.8084                            |
| <b>H2</b> | -51.3397                            | -55.7319                               | -43.4666                            | -50.7793                            | -55.1395                               | -42.9764                            |
| <b>H3</b> | -50.8832                            | -55.9012                               | -43.6793                            | -49.7816                            | -55.1066                               | -42.9133                            |
|           |                                     |                                        |                                     |                                     |                                        |                                     |
|           | <b>V<sub>2</sub>NO<sub>2</sub></b>  | <b>V<sub>2</sub>N(OH)<sub>2</sub></b>  | <b>V<sub>2</sub>NF<sub>2</sub></b>  | <b>V<sub>2</sub>CO<sub>2</sub></b>  | <b>V<sub>2</sub>C(OH)<sub>2</sub></b>  | <b>V<sub>2</sub>CF<sub>2</sub></b>  |
| <b>T1</b> | -45.1796                            | -52.0141                               | <b>-39.8067</b>                     | <b>-44.9353</b>                     | <b>-51.9408</b>                        | <b>-39.6926</b>                     |
| <b>T2</b> | -45.2036                            | -51.9769                               | -39.4984                            | -44.3574                            | -51.7800                               | -39.4295                            |
| <b>T3</b> | -45.1653                            | -51.7589                               | -39.3848                            | -44.6882                            | -51.6068                               | -39.2286                            |
| <b>H1</b> | <b>-45.3417</b>                     | <b>-52.1965</b>                        | -39.7241                            | -44.1755                            | -51.8062                               | -39.5806                            |
| <b>H2</b> | -45.2082                            | -51.9406                               | -39.7030                            | -44.6052                            | -51.3645                               | -39.0956                            |
| <b>H3</b> | -45.1929                            | -52.1065                               | -39.7595                            | -44.4219                            | -51.5418                               | -39.2740                            |
|           |                                     |                                        |                                     |                                     |                                        |                                     |
|           | <b>Nb<sub>2</sub>NO<sub>2</sub></b> | <b>Nb<sub>2</sub>N(OH)<sub>2</sub></b> | <b>Nb<sub>2</sub>NF<sub>2</sub></b> | <b>Nb<sub>2</sub>CO<sub>2</sub></b> | <b>Nb<sub>2</sub>C(OH)<sub>2</sub></b> | <b>Nb<sub>2</sub>CF<sub>2</sub></b> |
| <b>T1</b> | -47.7669                            | -53.4635                               | -41.5433                            | <b>-47.8641</b>                     | -54.0795                               | <b>-41.9134</b>                     |
| <b>T2</b> | <b>-47.8751</b>                     | -53.8260                               | -41.2858                            | -47.3626                            | <b>-54.1242</b>                        | -41.7734                            |
| <b>T3</b> | -47.4946                            | -53.7121                               | -40.9264                            | -47.7048                            | -53.7153                               | -41.5013                            |
| <b>H1</b> | -47.8375                            | -53.9650                               | -41.4398                            | -46.7022                            | -53.9721                               | -41.8226                            |
| <b>H2</b> | -47.3105                            | -53.7679                               | -41.5341                            | -47.1109                            | -53.3820                               | -41.1665                            |
| <b>H3</b> | -47.4915                            | <b>-53.9772</b>                        | <b>-41.5959</b>                     | -46.9300                            | -53.6435                               | -41.4243                            |
|           |                                     |                                        |                                     |                                     |                                        |                                     |
|           | <b>Ta<sub>2</sub>NO<sub>2</sub></b> | <b>Ta<sub>2</sub>N(OH)<sub>2</sub></b> | <b>Ta<sub>2</sub>NF<sub>2</sub></b> | <b>Ta<sub>2</sub>CO<sub>2</sub></b> | <b>Ta<sub>2</sub>C(OH)<sub>2</sub></b> | <b>Ta<sub>2</sub>CF<sub>2</sub></b> |
| <b>T1</b> | -51.9061                            | -56.6215                               | -51.9516                            | <b>-52.2268</b>                     | -57.5873                               | -45.1809                            |
| <b>T2</b> | -52.1160                            | -57.3294                               | -52.1212                            | -51.6938                            | -57.7371                               | -45.1831                            |
| <b>T3</b> | -51.6707                            | -57.1648                               | -51.6670                            | -52.0712                            | -57.2737                               | -44.7570                            |
| <b>H1</b> | <b>-52.1368</b>                     | <b>-57.5776</b>                        | <b>-52.1500</b>                     | -50.9602                            | <b>-57.7436</b>                        | <b>-45.4843</b>                     |
| <b>H2</b> | -51.3584                            | -57.2074                               | -51.3584                            | -51.4748                            | -57.0140                               | -44.5874                            |
| <b>H3</b> | -51.7395                            | -57.5063                               | -51.7395                            | -51.2238                            | -57.3454                               | -44.9455                            |
|           |                                     |                                        |                                     |                                     |                                        |                                     |
|           | <b>Cr<sub>2</sub>NO<sub>2</sub></b> | <b>Cr<sub>2</sub>N(OH)<sub>2</sub></b> | <b>Cr<sub>2</sub>NF<sub>2</sub></b> | <b>Cr<sub>2</sub>CO<sub>2</sub></b> | <b>Cr<sub>2</sub>C(OH)<sub>2</sub></b> | <b>Cr<sub>2</sub>CF<sub>2</sub></b> |
| <b>T1</b> | -43.0892                            | <b>-50.4827</b>                        | <b>-38.4405</b>                     | -43.0775                            | <b>-50.2019</b>                        | <b>-38.0244</b>                     |
| <b>T2</b> | -43.3605                            | -49.6199                               | -37.3715                            | -43.3605                            | -49.7715                               | -37.4378                            |
| <b>T3</b> | -43.0281                            | -50.1064                               | -37.9166                            | -43.1826                            | -50.0825                               | -37.8134                            |
| <b>H1</b> | <b>-43.7804</b>                     | -49.8074                               | -37.5663                            | <b>-43.7656</b>                     | -50.0087                               | -37.6990                            |
| <b>H2</b> | -43.3197                            | -50.2246                               | -37.9861                            | -43.3197                            | -50.0626                               | -37.8919                            |
| <b>H3</b> | -43.4670                            | -49.9732                               | -37.7080                            | -43.4670                            | -50.0495                               | -37.8092                            |
|           |                                     |                                        |                                     |                                     |                                        |                                     |
|           | <b>Mo<sub>2</sub>NO<sub>2</sub></b> | <b>Mo<sub>2</sub>N(OH)<sub>2</sub></b> | <b>Mo<sub>2</sub>NF<sub>2</sub></b> | <b>Mo<sub>2</sub>CO<sub>2</sub></b> | <b>Mo<sub>2</sub>C(OH)<sub>2</sub></b> | <b>Mo<sub>2</sub>CF<sub>2</sub></b> |

|           |                                     |                                        |                                     |                                     |                                        |                                     |
|-----------|-------------------------------------|----------------------------------------|-------------------------------------|-------------------------------------|----------------------------------------|-------------------------------------|
| <b>T1</b> | -45.6724                            | -52.1984                               | -39.7759                            | -45.9179                            | -52.1834                               | -40.5013                            |
| <b>T2</b> | -46.7709                            | -51.6272                               | -39.2256                            | -47.1149                            | -52.7117                               | -40.2910                            |
| <b>T3</b> | -46.3498                            | -51.8219                               | -40.1646                            | -46.3995                            | -52.4871                               | -40.0833                            |
| <b>H1</b> | <b>-47.0909</b>                     | -52.0129                               | -39.6644                            | <b>-47.5423</b>                     | -52.9049                               | -40.4838                            |
| <b>H2</b> | -46.5615                            | <b>-52.7942</b>                        | <b>-40.5122</b>                     | -46.5417                            | -52.9691                               | <b>-40.7571</b>                     |
| <b>H3</b> | -46.9263                            | -52.4377                               | -40.0294                            | -46.9038                            | <b>-52.9992</b>                        | -40.7019                            |
|           |                                     |                                        |                                     |                                     |                                        |                                     |
|           | <b>W<sub>2</sub>NO<sub>2</sub></b>  | <b>W<sub>2</sub>N(OH)<sub>2</sub></b>  | <b>W<sub>2</sub>NF<sub>2</sub></b>  | <b>W<sub>2</sub>CO<sub>2</sub></b>  | <b>W<sub>2</sub>C(OH)<sub>2</sub></b>  | <b>W<sub>2</sub>CF<sub>2</sub></b>  |
| <b>T1</b> | -49.9652                            | -55.4397                               | -42.8996                            | -50.1858                            | -55.5289                               | -43.6156                            |
| <b>T2</b> | -50.5922                            | -54.4791                               | -41.8730                            | -51.4844                            | -56.1021                               | -43.4573                            |
| <b>T3</b> | -50.2895                            | -55.0175                               | -42.3181                            | -50.5953                            | -55.8540                               | -43.2184                            |
| <b>H1</b> | <b>-50.9929</b>                     | -55.1403                               | -42.4529                            | <b>-52.1072</b>                     | -56.5309                               | -43.9095                            |
| <b>H2</b> | -50.4194                            | <b>-56.0201</b>                        | <b>-43.57605</b>                    | -50.8589                            | -56.4858                               | <b>-44.1008</b>                     |
| <b>H3</b> | -50.8756                            | -55.6462                               | -43.0438                            | -51.3038                            | <b>-56.5941</b>                        | -44.0844                            |
|           |                                     |                                        |                                     |                                     |                                        |                                     |
|           | <b>Mn<sub>2</sub>NO<sub>2</sub></b> | <b>Mn<sub>2</sub>N(OH)<sub>2</sub></b> | <b>Mn<sub>2</sub>NF<sub>2</sub></b> | <b>Mn<sub>2</sub>CO<sub>2</sub></b> | <b>Mn<sub>2</sub>C(OH)<sub>2</sub></b> | <b>Mn<sub>2</sub>CF<sub>2</sub></b> |
| <b>T1</b> | -41.6585                            | <b>-49.0458</b>                        | <b>-36.9699</b>                     | <b>-41.0790</b>                     | <b>-49.1869</b>                        | <b>-37.0995</b>                     |
| <b>T2</b> | -40.5312                            | -47.1151                               | -36.1395                            | -40.8113                            | -48.3219                               | -36.1066                            |
| <b>T3</b> | -41.2226                            | -48.3894                               | -36.2711                            | -40.6936                            | -48.7615                               | -36.6307                            |
| <b>H1</b> | -40.6999                            | -48.1382                               | -35.8886                            | -41.0701                            | -48.1650                               | -35.9332                            |
| <b>H2</b> | <b>-41.6864</b>                     | -48.5865                               | -36.5857                            | -40.8092                            | -48.9296                               | -36.7994                            |
| <b>H3</b> | -40.9475                            | -48.5443                               | -36.4228                            | -41.0067                            | -48.5319                               | -36.3489                            |

### Phonon calculations:

Finite displacement method was used to obtain phonon band structures using PHONOPY code<sup>27</sup>. Supercell of 4×4×1 and K-point mesh of 5×5×1 was used to obtain interatomic forces using VASP code. However, calculations are limited to smaller supercells due to limitations in

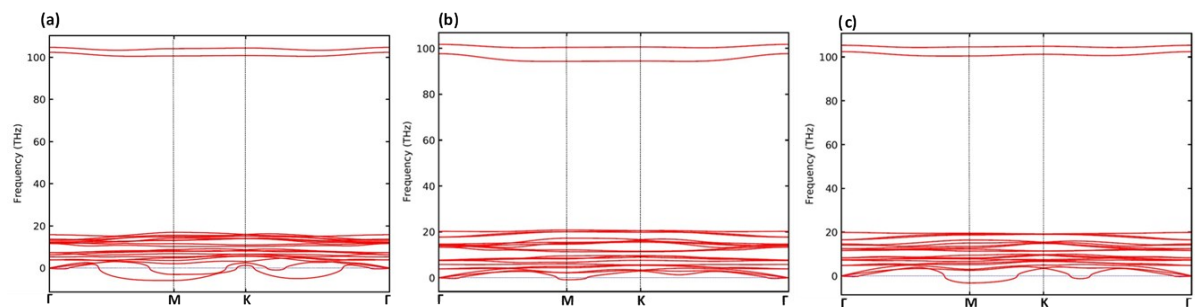

computational power.

**Figure S1:** Calculated phonon band structures of 2D (a) Nb<sub>2</sub>N(OH)<sub>2</sub> (b) W<sub>2</sub>C(OH)<sub>2</sub> and (c) Mo<sub>2</sub>C(OH)<sub>2</sub>.

Bader Charge Analysis: -

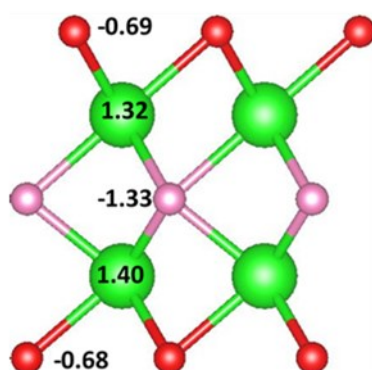

Figure S2: Excess bader charge on atoms calculated by conducting bader charge analysis.

Graphene/ $\text{Nb}_2\text{NF}_2$  heterostructure: -

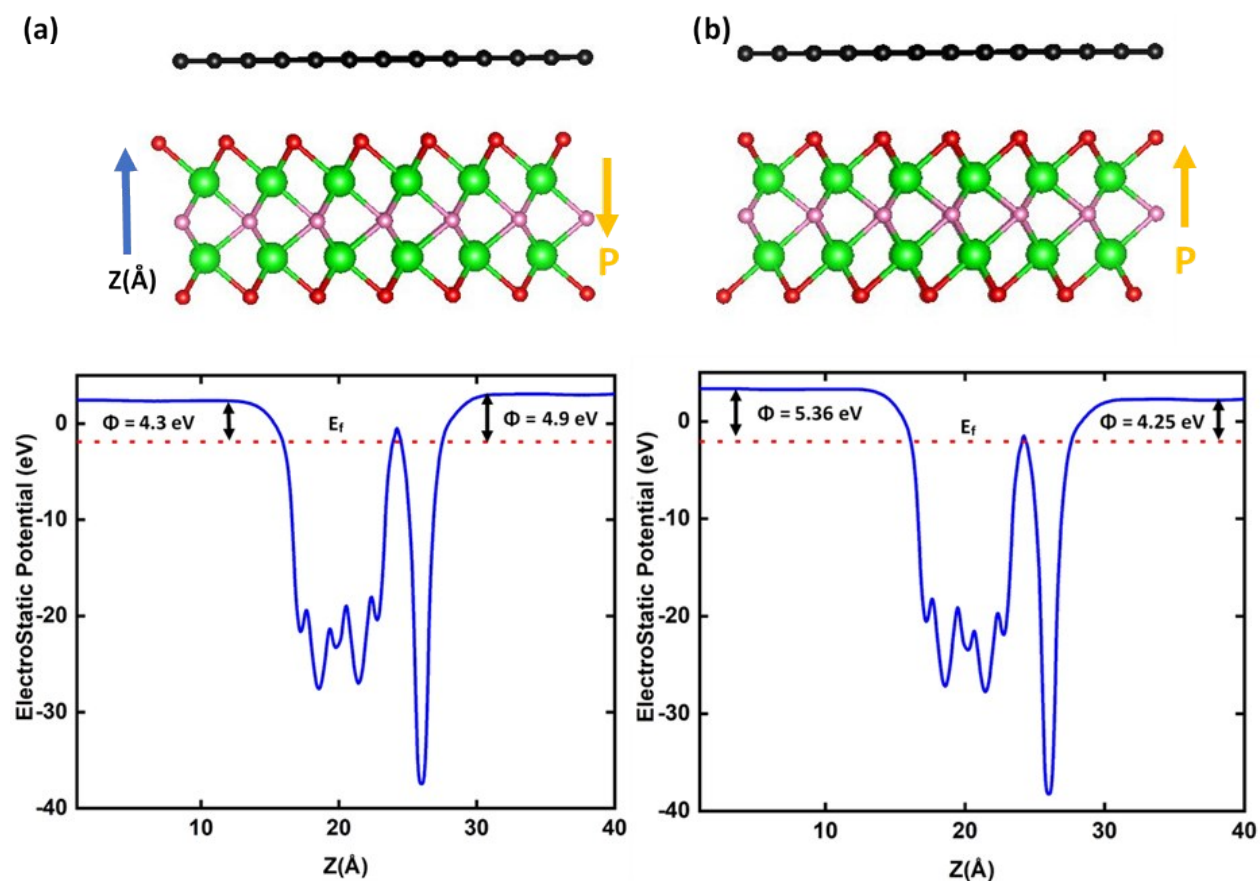

Figure S3: In-plane averaged electrostatic potential for monolayer  $\text{Nb}_2\text{NF}_2$  and Monolayer Graphene heterostructure with polarization acting (a) downwards and (b) upwards. Here,

fermi level and work function are indicated in  $E_f$  and  $\Phi$ . Polarization direction and out of plane direction ( $Z(\text{\AA})$ ) are indicated by orange and blue coloured arrows, respectively.
